# Supplementary material
Source: PubMed Central journal article supplement (PMC4788087)
Supplement: harc832824.wt1_default.pdf [file harc832824.wt1_default.pdf]

**Web table 1. Mortality by occupational class in 1913 never smoking women with information on co-resident's smoking habit and duration**

|                                        | Occupational class |                        |                        |                        | Trend p<br>across all 6<br>occupational<br>classes |
|----------------------------------------|--------------------|------------------------|------------------------|------------------------|----------------------------------------------------|
|                                        | I & II             | IIIN                   | IIIM                   | IV & V                 |                                                    |
| No of women                            | 394                | 505                    | 371                    | 643                    |                                                    |
| All cause                              |                    |                        |                        |                        |                                                    |
| No of deaths                           | 137                | 214                    | 187                    | 291                    |                                                    |
| Relative rate <sub>1</sub><br>(95% CI) | 1                  | 1.27<br>(1.02 to 1.57) | 1.41<br>(1.13 to 1.76) | 1.25<br>(1.02 to 1.53) | 0.07                                               |
| Relative rate <sub>2</sub><br>(95% CI) | 1                  | 1.26<br>(1.02 to 1.57) | 1.40<br>(1.12 to 1.74) | 1.23<br>(1.0 to 1.51)  | 0.10                                               |
| Relative rate <sub>3</sub><br>(95% CI) | 1                  | 1.26<br>(1.01 to 1.56) | 1.28<br>(1.02 to 1.60) | 1.14<br>(0.93 to 1.40) | 0.54                                               |
| Relative rate <sub>4</sub><br>(95% CI) | 1                  | 1.26<br>(1.01 to 1.56) | 1.26<br>(1.01 to 1.58) | 1.12<br>(0.91 to 1.38) | 0.65                                               |
| Cardiovascular disease                 |                    |                        |                        |                        |                                                    |
| No of deaths                           | 62                 | 84                     | 96                     | 161                    |                                                    |
| Relative rate <sub>1</sub><br>(95% CI) | 1                  | 1.10<br>(0.79 to 1.53) | 1.54<br>(1.11 to 2.12) | 1.49<br>(1.11 to 1.99) | 0.001                                              |
| Relative rate <sub>2</sub><br>(95% CI) | 1                  | 1.10<br>(0.79 to 1.53) | 1.52<br>(1.10 to 2.10) | 1.47<br>(1.09 to 1.97) | 0.002                                              |
| Relative rate <sub>3</sub><br>(95% CI) | 1                  | 1.09<br>(0.78 to 1.51) | 1.33<br>(0.96 to 1.83) | 1.29<br>(0.96 to 1.73) | 0.06                                               |
| Relative rate <sub>4</sub><br>(95% CI) | 1                  | 1.09<br>(0.78 to 1.51) | 1.31<br>(0.94 to 1.81) | 1.27<br>(0.94 to 1.71) | 0.08                                               |
| Coronary heart disease                 |                    |                        |                        |                        |                                                    |
| No of deaths                           | 32                 | 44                     | 48                     | 87                     |                                                    |
| Relative rate <sub>1</sub><br>(95% CI) | 1                  | 1.11<br>(0.70 to 1.75) | 1.55<br>(0.99 to 2.43) | 1.59<br>(1.06 to 2.39) | 0.014                                              |
| Relative rate <sub>2</sub><br>(95% CI) | 1                  | 1.11<br>(0.70 to 1.75) | 1.54<br>(0.98 to 2.42) | 1.58<br>(1.05 to 2.37) | 0.016                                              |
| Relative rate <sub>3</sub><br>(95% CI) | 1                  | 1.06<br>(0.67 to 1.68) | 1.29<br>(0.82 to 2.04) | 1.35<br>(0.89 to 2.04) | 0.14                                               |
| Relative rate <sub>4</sub><br>(95% CI) | 1                  | 1.06<br>(0.67 to 1.68) | 1.28<br>(0.81 to 1.96) | 1.34<br>(0.89 to 1.96) | 0.16                                               |

|                                        |    |                           |                           |                           |       |
|----------------------------------------|----|---------------------------|---------------------------|---------------------------|-------|
|                                        |    | 1.68)                     | 2.03)                     | 2.02)                     |       |
| Stroke                                 |    |                           |                           |                           |       |
| No of deaths                           | 21 | 27                        | 36                        | 53                        |       |
| Relative rate <sub>1</sub><br>(95% CI) | 1  | 1.07<br>(0.60 to<br>1.89) | 1.58<br>(0.92 to<br>2.71) | 1.40<br>(0.84 to<br>2.32) | 0.045 |
| Relative rate <sub>2</sub><br>(95% CI) | 1  | 1.07<br>(0.60 to<br>1.89) | 1.55<br>(0.90 to<br>2.66) | 1.37<br>(0.82 to<br>2.27) | 0.059 |
| Relative rate <sub>3</sub><br>(95% CI) | 1  | 1.07<br>(0.60 to<br>1.89) | 1.43<br>(0.83 to<br>2.47) | 1.26<br>(0.75 to<br>2.09) | 0.16  |
| Relative rate <sub>4</sub><br>(95% CI) | 1  | 1.06<br>(0.60 to<br>1.89) | 1.39<br>(0.80 to<br>2.41) | 1.22<br>(0.73 to<br>2.05) | 0.20  |
| Respiratory                            |    |                           |                           |                           |       |
| No of deaths                           | 9  | 7                         | 14                        | 22                        |       |
| Relative rate <sub>1</sub><br>(95% CI) | 1  | 0.66<br>(0.25 to<br>1.77) | 1.49<br>(0.64 to<br>3.45) | 1.38<br>(0.63 to 3.0)     | 0.24  |
| Relative rate <sub>2</sub><br>(95% CI) | 1  | 0.66<br>(0.25 to<br>1.78) | 1.53<br>(0.66 to<br>3.56) | 1.42<br>(0.65 to<br>3.09) | 0.21  |
| Relative rate <sub>3</sub><br>(95% CI) | 1  | 0.67<br>(0.25 to<br>1.80) | 1.26<br>(0.53 to<br>2.98) | 1.27<br>(0.58 to<br>2.78) | 0.41  |
| Relative rate <sub>4</sub><br>(95% CI) | 1  | 0.67<br>(0.25 to<br>1.81) | 1.30<br>(0.55 to<br>3.07) | 1.31<br>(0.60 to<br>2.87) | 0.37  |
| Cancer                                 |    |                           |                           |                           |       |
| No of deaths                           | 47 | 92                        | 50                        | 70                        |       |
| Relative rate <sub>1</sub><br>(95% CI) | 1  | 1.57<br>(1.11 to<br>2.24) | 1.17<br>(0.78 to<br>1.74) | 0.91<br>(0.63 to<br>1.31) | 0.16  |
| Relative rate <sub>2</sub><br>(95% CI) | 1  | 1.57<br>(1.10 to<br>2.23) | 1.16<br>(0.78 to<br>1.73) | 0.90<br>(0.62 to<br>1.31) | 0.15  |
| Relative rate <sub>5</sub><br>(95% CI) | 1  | 1.58<br>(1.11 to<br>2.24) | 1.13<br>(0.75 to<br>1.69) | 0.87<br>(0.60 to<br>1.27) | 0.09  |
| Relative rate <sub>6</sub><br>(95% CI) | 1  | 1.57<br>(1.11 to<br>2.24) | 1.12<br>(0.75 to<br>1.68) | 0.87<br>(0.59 to<br>1.26) | 0.09  |
| Smoking related cancers                |    |                           |                           |                           |       |
| No of deaths                           | 16 | 24                        | 15                        | 25                        |       |
| Relative rate <sub>1</sub><br>(95% CI) | 1  | 1.21<br>(0.65 to<br>2.29) | 1.05<br>(0.52 to<br>2.14) | 0.96<br>(0.51 to<br>1.80) | 0.59  |
| Relative rate <sub>2</sub><br>(95% CI) | 1  | 1.21<br>(0.64 to          | 1.05<br>(0.52 to          | 0.96<br>(0.51 to          | 0.58  |

|                                        |    |                           |                           |                           |       |
|----------------------------------------|----|---------------------------|---------------------------|---------------------------|-------|
|                                        |    | 2.28)                     | 2.13)                     | 1.80)                     |       |
| Relative rate <sub>5</sub><br>(95% CI) | 1  | 1.22<br>(0.65 to<br>2.30) | 0.98<br>(0.48 to<br>2.01) | 0.91<br>(0.48 to<br>1.72) | 0.43  |
| Relative rate <sub>6</sub><br>(95% CI) | 1  | 1.22<br>(0.65 to<br>2.30) | 0.98<br>(0.48 to<br>2.01) | 0.90<br>(0.48 to<br>1.71) | 0.43  |
| Non-smoking related<br>cancers         |    |                           |                           |                           |       |
| No of deaths                           | 31 | 68                        | 35                        | 45                        |       |
| Relative rate <sub>1</sub><br>(95% CI) | 1  | 1.76<br>(1.15 to<br>2.69) | 1.23<br>(0.76 to 2.0)     | 0.88<br>(0.56 to<br>1.39) | 0.18  |
| Relative rate <sub>2</sub><br>(95% CI) | 1  | 1.75<br>(1.15 to<br>2.68) | 1.22<br>(0.75 to<br>1.98) | 0.87<br>(0.55 to<br>1.38) | 0.17  |
| Relative rate <sub>5</sub><br>(95% CI) | 1  | 1.76<br>(1.15 to<br>2.69) | 1.20<br>(0.74 to<br>1.96) | 0.85<br>(0.54 to<br>1.36) | 0.14  |
| Relative rate <sub>6</sub><br>(95% CI) | 1  | 1.76<br>(1.15 to<br>2.69) | 1.20<br>(0.73 to<br>1.95) | 0.85<br>(0.53 to<br>1.35) | 0.13  |
| Breast cancer                          |    |                           |                           |                           |       |
| No of deaths                           | 12 | 25                        | 10                        | 10                        |       |
| Relative rate <sub>1</sub><br>(95% CI) | 1  | 1.66<br>(0.83 to<br>3.30) | 0.88<br>(0.38 to<br>2.04) | 0.50<br>(0.21 to<br>1.15) | 0.024 |
| Relative rate <sub>2</sub><br>(95% CI) | 1  | 1.66<br>(0.83 to<br>3.31) | 0.88<br>(0.38 to<br>2.06) | 0.50<br>(0.22 to<br>1.16) | 0.026 |
| Relative rate <sub>5</sub><br>(95% CI) | 1  | 1.69<br>(0.85 to<br>3.36) | 0.92<br>(0.39 to<br>2.16) | 0.52<br>(0.22 to<br>1.22) | 0.039 |
| Relative rate <sub>6</sub><br>(95% CI) | 1  | 1.69<br>(0.85 to<br>3.37) | 0.92<br>(0.39 to<br>2.18) | 0.52<br>(0.22 to<br>1.23) | 0.042 |

---

Relative rate<sub>1</sub> adjusted for age

Relative rate<sub>2</sub> adjusted for age and co-resident's pack years

Relative rate<sub>3</sub> adjusted for age, body mass index, systolic blood pressure, cholesterol, height, % predicted FEV1, angina, ischaemia on ECG and bronchitis

Relative rate<sub>4</sub> adjusted for age, body mass index, systolic blood pressure, cholesterol, height, % predicted FEV1, angina, ischaemia on ECG, bronchitis and co-resident's pack years

Relative rate<sub>5</sub> adjusted for age, body mass index, systolic blood pressure, cholesterol, height and % predicted FEV1

Relative rate<sub>6</sub> adjusted for age, body mass index, systolic blood pressure, cholesterol, height, % predicted FEV1 and co-resident's pack years
